# Supplementary material for: Deep analysis of immune response and metabolic signature in children with food protein induced enterocolitis to cow’s milk
Source: Springer Nature journal article supplement (doi:10.1186/s13601-018-0224-9), 2018-09-05

## Additional file 1 – Cytokine secretion after mitogen reactivation of PBMC

Cytokines secreted after nonspecific reactivation of PBMC from IgE-CMA (blue) or FPIES-CMA (red) patients. PBMC were stimulated for 6 days with 1  $\mu\text{g/ml}$  of PHA (A) or LPS (B) and cytokines assayed in supernatants using Luminex<sup>®</sup> xMap<sup>®</sup> technology and kits and apparatus from Bio-rad. Results are expressed as medians obtained for the PBMC from IgE-CMA or FPIES-CMA patients. Statistics: \* indicated a significant difference between non-stimulated (media alone) and stimulated PBMC within the same group of patient ( $p < 0.05$  using Wilcoxon sign rank test). Trend between IgE-CMA and FPIES-CMA patients are also indicated (Mann Whitney test).

**A**

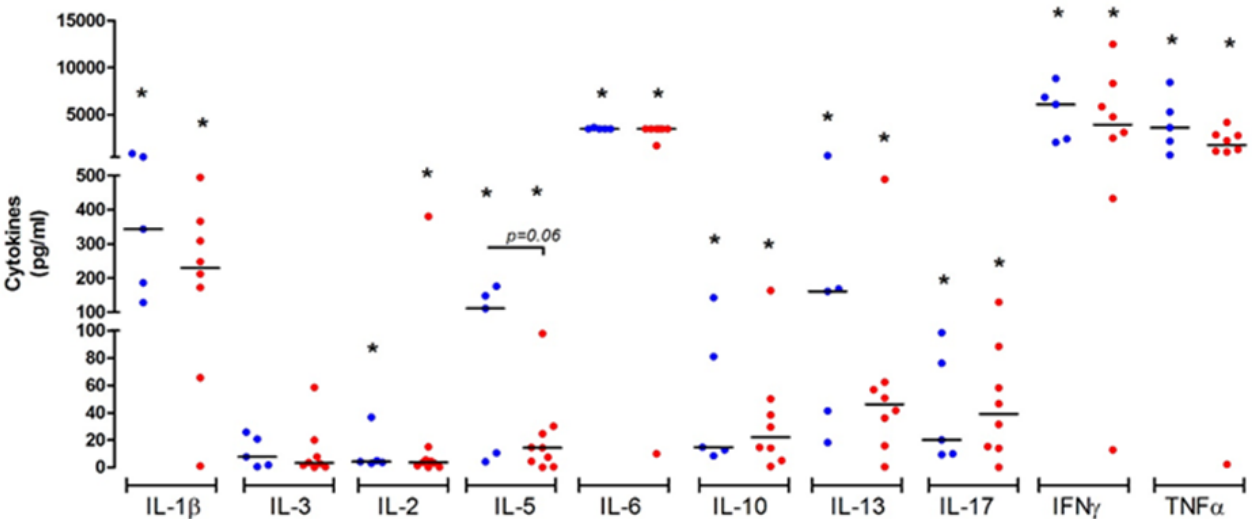

**B**

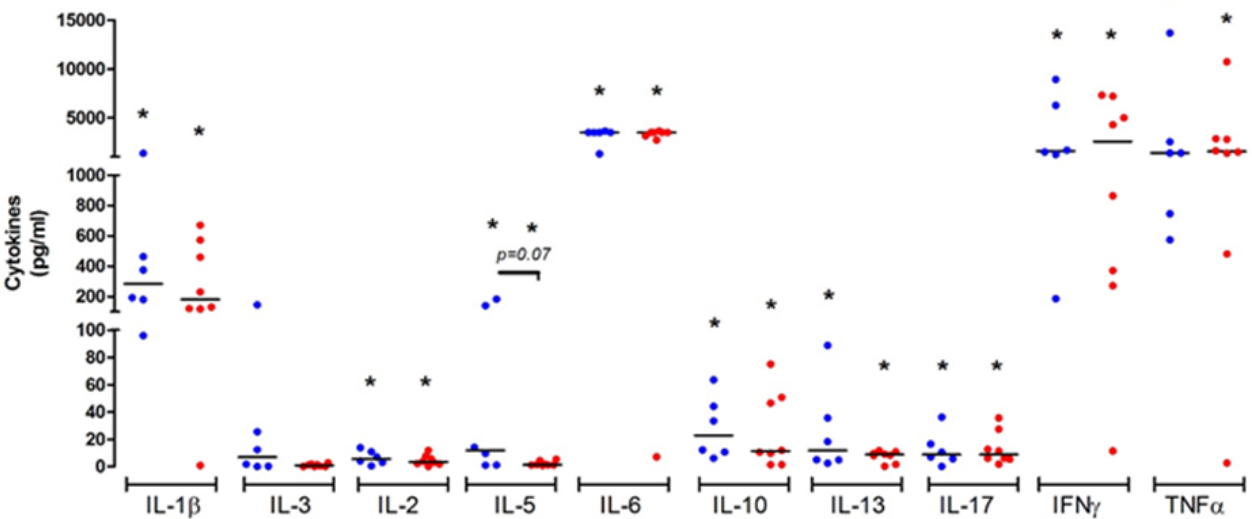

Supplement: MOESM1 [file 16157238]
