# Supplementary material for: Deep analysis of immune response and metabolic signature in children with food protein induced enterocolitis to cow’s milk
Source: Springer Nature journal article supplement (doi:10.1186/s13601-018-0224-9), 2018-09-05
Supplement: MOESM2 [file 16157238]

## Additional file 2 : Analysis of memory cells within PBMC before and after reactivation using PHA mitogen

Memory Th1, Th2, Th17 and Treg cells in non-stimulated (A) and PHA-activated (B) PBMC. *Analysis of T helper memory cells:* after 6 days of culture, PBMC were collected and labelled extracellularly with anti-human CD4, CD25, CD45RA, CCR6, CXCR3 and CCR4. Gating strategies were performed as described in [1], to analyse memory Th1, Th2, Th17 and Th1\* cells. Within CD4<sup>+</sup> single cells, CD25<sup>-</sup>CD45RA<sup>-</sup> memory cells were selected, and further analysed for CCR6, CXCR3 and CCR4 expression. Th1 memory cells (mTh1, ■) correspond to CXCR3<sup>+</sup>CCR4<sup>-</sup> cells within CCR6<sup>-</sup> population, Th2 memory cells (mTh2, ■) correspond to CXCR3<sup>-</sup>CCR4<sup>+</sup> cells within CCR6<sup>-</sup> population, Th17 memory cells (mTh17, ■) to CXCR3<sup>-</sup>CCR4<sup>+</sup> cells within CCR6<sup>+</sup> population and non-conventional Th1 memory cells (mTh1\*) to CXCR3<sup>+</sup>CCR4<sup>-</sup> cells within CCR6<sup>+</sup>. This latter population was not numerous enough to be analysed (not shown). Results are expressed as percentage of corresponding cells within the selected CD25<sup>-</sup>CD45RA<sup>-</sup> population of CD4<sup>+</sup> single cells. *Analysis of Treg cells:* after 6 days of culture, PBMC were collected and labelled extracellularly with anti-human CD3, CD4, CD25 and intracellularly with Foxp3. Treg cells (□) were defined as CD25<sup>+</sup>Foxp3<sup>+</sup> population within CD3<sup>+</sup>CD4<sup>+</sup> single cells.

\* indicates a significant difference between IgE-CMA and FPIES-CMA patients ( $p < 0.05$ , Mann Whitney test).

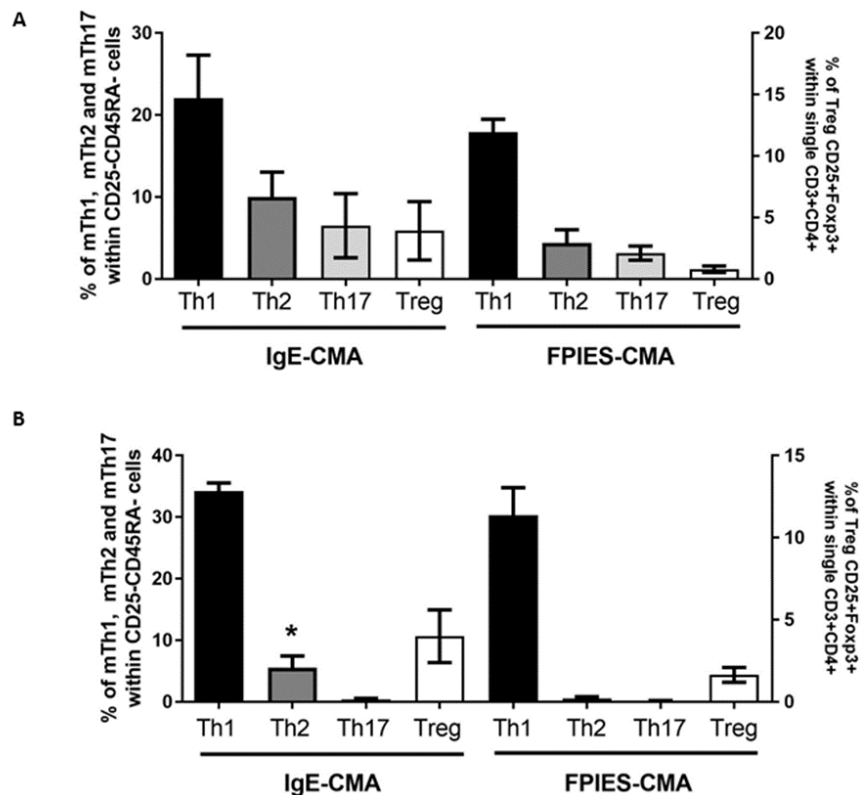

1. Becattini S, Latorre D, Mele F, Foglierini M, De GC, Cassotta A, Fernandez B, Kelderman S, Schumacher TN, Corti D *et al*: T cell immunity. Functional heterogeneity of human memory CD4(+) T cell clones primed by pathogens or vaccines. *Science*. 2015; 347(6220):400-406.
